# Supplementary material for: HCV and flaviviruses hijack cellular mechanisms for nuclear STAT2 degradation: Up-regulation of PDLIM2 suppresses the innate immune response
Source: PubMed Central journal article supplement (PMC6677295; doi:10.1371/journal.ppat.1007949), 2019-08-02
Supplement: ppat.1007949.s008.pdf [file ppat.1007949.s008.pdf]

S1 Table.

| Gene: |       | TRIM21              | IRF7                | IRF9                | OAS3                 | MX1                  | ISG20                | IFI6                | TICAM1               | VISA                | IRF3                | IFI44               | IFIT2                | IFIT3                | CXCL9               | RELA                | CXCL10               | CXCL11               | ICAM1               |
|-------|-------|---------------------|---------------------|---------------------|----------------------|----------------------|----------------------|---------------------|----------------------|---------------------|---------------------|---------------------|----------------------|----------------------|---------------------|---------------------|----------------------|----------------------|---------------------|
| Day2  | UN    | 1.00<br>(0.94-1.07) | 1.00<br>(0.94-1.07) | 1.00<br>(0.92-1.09) | 1.00<br>(0.92-1.08)  | 1.00<br>(0.93-1.08)  | 1.00<br>(0.89-1.13)  | 1.00<br>(0.91-1.10) | 1.00<br>(0.85-1.18)  | 1.00<br>(0.94-1.07) | 1.00<br>(0.81-1.23) | 1.00<br>(0.94-1.07) | 1.00<br>(0.94-1.07)  | 1.00<br>(0.94-1.07)  | 1.00<br>(0.60-1.67) | 1.00<br>(0.91-1.09) | 1.00<br>(0.92-1.08)  | 1.00<br>(0.66-1.51)  | 1.00<br>(0.94-1.07) |
|       | HCV A | 1.39<br>(1.19-1.62) | ND                  | 1.35<br>(1.06-1.74) | 1.03<br>(0.84-1.26)  | 0.95<br>(0.88-1.03)  | 1.37<br>(1.27-1.47)  | 0.85<br>(0.80-0.91) | 1.30<br>(1.19-1.42)  | 1.22<br>(1.14-1.29) | 0.71<br>(0.64-0.80) | 4.75<br>(4.43-5.09) | 2.61<br>(2.30-2.96)  | 1.30<br>(0.98-1.72)  | 0.51<br>(0.32-0.80) | 1.27<br>(1.19-1.35) | 2.03<br>(1.86-2.21)  | 0.62<br>(0.40-0.97)  | 1.33<br>(1.25-1.41) |
|       | HCV B | 1.17<br>(0.94-1.46) | ND                  | 1.16<br>(1.09-1.23) | 1.03<br>(0.90-1.18)  | 1.01<br>(0.95-1.08)  | 1.58<br>(1.41-1.77)  | 0.92<br>(0.87-0.98) | 1.20<br>(1.13-1.27)  | 1.17<br>(1.09-1.25) | 0.77<br>(0.69-0.85) | 5.92<br>(5.11-6.85) | 2.32<br>(2.09-2.57)  | 1.13<br>(1.06-1.20)  | 0.26<br>(0.19-0.35) | 1.14<br>(1.04-1.24) | 1.25<br>(1.13-1.38)  | 0.94<br>(0.82-1.08)  | 1.18<br>(1.11-1.25) |
| Day4  | UN    | 1.00<br>(0.93-1.08) | 1.00<br>(0.97-1.04) | 1.00<br>(0.93-1.07) | 1.00<br>(0.68-1.46)  | 1.00<br>(0.97-1.04)  | 1.00<br>(0.89-1.13)  | 1.00<br>(0.89-1.12) | 1.00<br>(0.87-1.15)  | 1.00<br>(0.94-1.07) | 1.00<br>(0.96-1.05) | 1.00<br>(0.97-1.04) | 1.00<br>(0.94-1.06)  | 1.00<br>(0.60-1.67)  | 1.00<br>(0.96-1.04) | 1.00<br>(0.77-1.30) | 1.00<br>(0.75-1.33)  | 1.00<br>(0.96-1.04)  |                     |
|       | HCV A | 4.74<br>(4.43-5.06) | 1.93<br>(1.93-1.93) | 8.44<br>(8.06-8.84) | 9.20<br>(8.83-9.59)  | 10.98<br>(10.6-11.4) | 13.26<br>(13.0-13.6) | 3.23<br>(2.93-3.56) | 6.10<br>(5.44-6.83)  | 2.47<br>(2.44-2.51) | 2.02<br>(1.85-2.21) | 464.8<br>(438-493)  | 98.62<br>(97.4-99.9) | 15.12<br>(15.1-15.2) | 7.34<br>(6.53-8.25) | 2.92<br>(2.86-2.98) | 22.05<br>(19.6-24.9) | 9.96<br>(8.79-11.3)  | 8.53<br>(8.09-9.01) |
|       | HCV B | 4.00<br>(3.81-4.19) | 5.11<br>(4.52-5.78) | 7.47<br>(7.01-7.96) | 7.78<br>(5.79-10.5)  | 10.01<br>(9.24-10.9) | 13.85<br>(13.3-14.5) | 2.97<br>(2.38-3.70) | 5.15<br>(4.74-5.60)  | 2.03<br>(1.93-2.13) | 1.68<br>(1.54-1.83) | 398.2<br>(378-419)  | 100.6<br>(97.9-106)  | 17.14<br>(14.2-20.8) | 7.72<br>(5.39-11.0) | 2.65<br>(2.46-2.87) | 17.13<br>(15.8-18.6) | 13.01<br>(11.6-14.6) | 6.73<br>(6.45-7.03) |
| Day7  | UN    | 1.00<br>(0.94-1.07) | 1.00<br>(0.87-1.15) | 1.00<br>(0.94-1.06) | 1.00<br>(0.61-1.64)  | 1.00<br>(0.94-1.06)  | 1.00<br>(0.97-1.03)  | 1.00<br>(0.85-1.18) | 1.00<br>(0.94-1.07)  | 1.00<br>(1.00-1.11) | 1.00<br>(0.90-1.11) | 1.00<br>(0.98-1.02) | 1.00<br>(0.89-1.13)  | 1.00<br>(0.78-1.28)  | 1.00<br>(0.46-2.20) | 1.00<br>(0.98-1.02) | 1.00<br>(0.94-1.07)  | 1.00<br>(0.98-1.02)  | 1.00<br>(0.94-1.06) |
|       | HCV A | 7.04<br>(6.52-7.61) | 1.35<br>(1.06-1.74) | 9.24<br>(8.48-10.1) | 29.68<br>(27.0-32.6) | 24.34<br>(22.4-26.5) | 11.70<br>(10.8-12.6) | 9.32<br>(8.07-10.8) | 12.21<br>(11.3-12.7) | 3.92<br>(3.61-4.25) | 2.62<br>(2.41-2.85) | 361.7<br>(319-410)  | 33.03<br>(29.6-36.9) | 74.89<br>(68.5-81.9) | 10.9<br>(8.72-13.6) | 4.20<br>(3.86-4.57) | 54.12<br>(45.3-64.7) | 1.24<br>(1.14-1.34)  | 5.54<br>(5.12-5.98) |
|       | HCV B | 6.38<br>(6.20-6.57) | 3.00<br>(0.94-9.32) | 7.48<br>(6.95-8.04) | 31.31<br>(28.9-33.9) | 23.14<br>(22.5-23.9) | 12.62<br>(11.5-13.9) | 9.02<br>(8.55-9.52) | 9.33<br>(8.58-10.2)  | 3.54<br>(3.40-3.70) | 1.83<br>(1.75-1.92) | 298.5<br>(270-330)  | 29.79<br>(29.2-31.5) | 56.42<br>(44.1-72.2) | 9.75<br>(7.00-13.6) | 3.61<br>(3.34-3.90) | 43.27<br>(41.2-45.5) | 3.46<br>(2.43-4.53)  | 5.00<br>(4.80-5.20) |

| Gene: |       | IL18                 | IL15                | IFNA2                | IFNB1                | IFNG                 | IFIH1                | STAT1               | STAT2               | SOCS1               | SOCS3                | HLA-A               | HLA-C               | MICA                 | ULBP2               | PDLIM2               | ISG15                | USP18               | NLRX1               |
|-------|-------|----------------------|---------------------|----------------------|----------------------|----------------------|----------------------|---------------------|---------------------|---------------------|----------------------|---------------------|---------------------|----------------------|---------------------|----------------------|----------------------|---------------------|---------------------|
| Day2  | UN    | 1.00<br>(0.93-1.07)  | 1.00<br>(0.90-1.11) | 1.00<br>(0.72-1.39)  | 1.00<br>(0.94-1.07)  | 1.00<br>(0.94-1.07)  | 1.00<br>(0.93-1.08)  | 1.00<br>(0.94-1.07) | 1.00<br>(0.92-1.09) | 1.00<br>(0.92-1.09) | 1.00<br>(0.88-1.14)  | 1.00<br>(0.94-1.07) | 1.00<br>(0.90-1.11) | 1.00<br>(0.94-1.07)  | 1.00<br>(0.91-1.10) | 1.00<br>(0.93-1.07)  | 1.00<br>(0.93-1.07)  | 1.00<br>(0.93-1.07) | 1.00<br>(0.93-1.07) |
|       | HCV A | 1.36<br>(1.24-1.49)  | 1.14<br>(1.01-1.28) | 0.52<br>(0.49-0.55)  | 0.75<br>(0.17-3.36)  | ND                   | 2.62<br>(2.45-2.80)  | 1.22<br>(1.14-1.30) | 1.16<br>(1.08-1.24) | 1.16<br>(1.06-1.27) | 0.96<br>(0.90-1.03)  | 1.09<br>(1.03-1.16) | 1.64<br>(1.48-1.81) | 0.42<br>(0.06-2.75)  | 1.38<br>(1.20-1.59) | 1.56<br>(1.41-1.73)  | 1.07<br>(1.00-1.15)  | 1.12<br>(1.03-1.22) | 1.27<br>(1.11-1.46) |
|       | HCV B | 1.51<br>(1.40-1.63)  | 1.20<br>(0.94-1.53) | 0.75<br>(0.53-1.06)  | 3.57<br>(3.38-3.78)  | ND                   | 1.99<br>(1.23-3.22)  | 1.10<br>(1.02-1.17) | 1.19<br>(1.12-1.26) | 1.22<br>(1.15-1.29) | 0.89<br>(0.75-1.06)  | 1.14<br>(1.07-1.21) | 1.25<br>(0.94-1.65) | 0.11<br>(0.04-0.28)  | 1.43<br>(1.28-1.60) | 0.93<br>(0.84-1.04)  | 1.08<br>(0.90-1.29)  | 1.17<br>(1.10-1.23) | 1.10<br>(0.92-1.32) |
| Day4  | UN    | 1.00<br>(0.95-1.06)  | 1.00<br>(0.93-1.08) | 1.00<br>(0.94-1.06)  | 1.00<br>(0.27-3.67)  | 1.00<br>(0.94-1.07)  | 1.00<br>(0.50-1.99)  | 1.00<br>(0.95-1.06) | 1.00<br>(0.96-1.04) | 1.00<br>(0.95-1.05) | 1.00<br>(0.88-1.14)  | 1.00<br>(0.97-1.04) | 1.00<br>(0.90-1.11) | 1.00<br>(0.19-5.18)  | 1.00<br>(0.97-1.04) | 1.00<br>(0.96-1.05)  | 1.00<br>(0.94-1.07)  | 1.00<br>(0.91-1.09) | 1.00<br>(0.97-1.04) |
|       | HCV A | 4.96<br>(4.94-4.98)  | 6.77<br>(6.26-7.31) | 5.96<br>(5.47-6.48)  | 6.24<br>(5.21-7.48)  | ND                   | 177.9<br>(170-187)   | 2.38<br>(2.19-2.59) | 2.83<br>(2.72-2.94) | 0.72<br>(0.65-0.79) | 14.69<br>(14.4-15.0) | 3.10<br>(3.07-3.14) | 2.56<br>(2.32-2.82) | 40.85<br>(24.3-68.7) | 6.02<br>(5.46-6.63) | 14.52<br>(14.3-14.7) | 39.09<br>(33.8-48.3) | 1.73<br>(1.67-1.80) | 4.47<br>(4.16-4.81) |
|       | HCV B | 5.38<br>(5.08-5.69)  | 5.30<br>(4.8-5.9)   | 2.13<br>(1.09-4.13)  | 5.45<br>(4.10-7.25)  | 24.02<br>(20.1-28.7) | 184.5<br>(177-192)   | 2.03<br>(1.95-2.12) | 2.54<br>(2.30-2.80) | 0.46<br>(0.42-0.50) | 13.12<br>(12.1-14.3) | 2.86<br>(2.74-2.99) | 3.18<br>(2.68-3.77) | 2.18<br>(0.51-9.28)  | 4.26<br>(3.92-4.63) | 12.53<br>(10.6-14.9) | 40.87<br>(37.6-44.4) | 1.69<br>(1.60-1.78) | 3.31<br>(3.02-3.64) |
| Day7  | UN    | 1.00<br>(0.92-1.08)  | 1.00<br>(0.94-1.07) | 1.00<br>(0.91-1.10)  | 1.00<br>(0.68-1.46)  | 1.00<br>(0.94-1.07)  | 1.00<br>(0.85-1.18)  | 1.00<br>(0.90-1.12) | 1.00<br>(0.95-1.05) | 1.00<br>(0.89-1.12) | 1.00<br>(0.82-1.23)  | 1.00<br>(0.97-1.04) | 1.00<br>(0.96-1.04) | 1.00<br>(0.95-1.05)  | 1.00<br>(0.98-1.02) | 1.00<br>(0.95-1.06)  | 1.00<br>(0.87-1.15)  | 1.00<br>(0.92-1.09) | 1.00<br>(0.91-1.10) |
|       | HCV A | 17.29<br>(15.9-18.8) | 5.84<br>(5.00-6.82) | 20.63<br>(18.7-22.8) | 13.63<br>(10.1-18.5) | ND                   | 77.05<br>(69.8-85.0) | 3.65<br>(3.36-3.96) | 3.72<br>(3.29-4.20) | 0.94<br>(0.83-1.06) | 11.23<br>(10.4-12.2) | 3.70<br>(3.42-4.00) | 4.16<br>(3.64-4.74) | 71.71<br>(51.5-100)  | 2.77<br>(2.47-3.11) | 8.07<br>(7.15-9.11)  | 34.59<br>(26.7-44.9) | 3.86<br>(3.56-4.19) | 6.91<br>(5.77-8.27) |
|       | HCV B | 13.74<br>(12.5-15.1) | 5.20<br>(5.01-5.40) | 7.14<br>(3.58-14.2)  | 6.38<br>(5.39-7.55)  | 16.15<br>(15.7-16.6) | 93.15<br>(90.6-95.7) | 3.33<br>(3.20-3.46) | 3.36<br>(3.23-3.49) | 0.94<br>(0.84-1.04) | 8.61<br>(8.36-8.86)  | 3.79<br>(3.65-3.95) | 3.86<br>(3.54-4.21) | 58.67<br>(51.2-67.2) | 2.66<br>(2.25-3.14) | 5.61<br>(5.45-5.78)  | 38.84<br>(30.7-49.1) | 3.85<br>(3.52-4.20) | 4.61<br>(4.40-4.83) |

| Gene: |       | OTUD5               | XAF-1               | PCNA                | HSPA5               | ALB                 |
|-------|-------|---------------------|---------------------|---------------------|---------------------|---------------------|
| Day2  | UN    | 1.00<br>(0.94-1.07) | 1.00<br>(0.94-1.07) | 1.00<br>(0.93-1.07) | 1.00<br>(0.94-1.07) | 1.00<br>(0.90-1.11) |
|       | HCV A | 1.12<br>(1.05-1.19) | 1.03<br>(0.97-1.10) | 0.93<br>(0.87-0.99) | 1.74<br>(1.62-1.86) | 1.24<br>(1.15-1.33) |
|       | HCV B | 1.07<br>(1.01-1.13) | ND                  | 0.99<br>(0.93-1.04) | 1.50<br>(1.41-1.58) | 1.21<br>(1.00-1.46) |
| Day4  | UN    | 1.00<br>(0.91-1.10) | 1.00<br>(0.97-1.04) | 1.00<br>(0.94-1.06) | 1.00<br>(0.95-1.05) | 1.00<br>(0.94-1.06) |
|       | HCV A | 2.61<br>(2.59-2.62) | ND                  | 0.63<br>(0.59-0.67) | 3.50<br>(3.41-3.58) | 1.72<br>(1.70-1.73) |
|       | HCV B | 2.60<br>(2.45-2.77) | 4.59<br>(3.66-5.75) | 0.66<br>(0.63-0.69) | 3.41<br>(3.26-3.56) | 1.47<br>(1.37-1.57) |
| Day7  | UN    | 1.00<br>(0.96-1.04) | 1.00<br>(0.98-1.02) | 1.00<br>(0.96-1.04) | 1.00<br>(0.98-1.02) | 1.00<br>(0.93-1.08) |
|       | HCV A | 2.39<br>(2.08-2.74) | 2.71<br>(2.45-2.99) | 2.36<br>(2.14-2.59) | 5.54<br>(5.08-6.04) | 1.89<br>(1.75-2.04) |
|       | HCV B | 2.37<br>(2.27-2.47) | 1.51<br>(1.47-1.55) | 1.99<br>(1.85-2.13) | 5.82<br>(5.46-6.21) | 1.80<br>(1.69-1.91) |

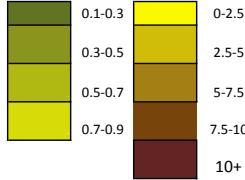

S1 Table. Induction of interferon response genes by HCV infection. Huh7.5 cells were infected with 3GE of HCV strain JFH-1, for 2, 4 or 7 days in duplicate wells (A and B). RNA was isolated by Trizol extraction and cDNA made using random primers and MMLV reverse transcriptase. Quantitative PCR was done using a TaqMan OpenArray with 300ng of cDNA on an ABI 7900HT. Samples were normalized to HPRT levels and fold change compared to uninfected is displayed. Two experiments (HCV A and B) are shown.
