# Supplementary material for: HCV and flaviviruses hijack cellular mechanisms for nuclear STAT2 degradation: Up-regulation of PDLIM2 suppresses the innate immune response
Source: PubMed Central journal article supplement (PMC6677295; doi:10.1371/journal.ppat.1007949), 2019-08-02
Supplement: ppat.1007949.s009.pdf [file ppat.1007949.s009.pdf]

S2 Table

Assay numbers for TaqMan, OpenArray custom PCR assay.

|                               |                      |
|-------------------------------|----------------------|
| GAPDH-Hs9999905_m1            | IRF3-Hs00155574_m1   |
| ALB-Hs00910225_m1             | IRF7-Hs00185375_m1   |
| CCL8-Hs99999026_m1            | IRF9-Hs00196051_m1   |
| CLEC2D-Hs00203174_m1          | ISG15-Hs00192713_m1  |
| CXCL10-Hs00171042_m1          | ISG20-Hs00158122_m1  |
| CXCL11-Hs00171138_m1          | MICA-Hs00741286_m1   |
| CXCL9-Hs00171065_m1           | MX1-Hs00182073_m1    |
| HLA-A;HLA-A29.1-Hs01058806_g1 | NLRX1-Hs01123237_m1  |
| HLA-C-Hs03044135_m1           | OAS3-Hs00196324_m1   |
| HLA-DRA-Hs00219575_m1         | OASL-Hs00388714_m1   |
| HLA-G-Hs00365950_g1           | OTUD5-Hs01012043_m1  |
| HPRT1-Hs9999909_m1            | PCNA-Hs00952870_g1   |
| HSPA5-Hs00946084_g1           | PDLIM2-Hs00917389_m1 |
| ICAM1-Hs00164932_m1           | RELA-Hs01042010_m1   |
| IFI44-Hs00197427_m1           | SOCS1-Hs00864158_g1  |
| IFI6-Hs00242571_m1            | SOCS3-Hs02330328_s1  |
| IFIH1-Hs01070332_m1           | STAT1-Hs01013989_m1  |
| IFIT2-Hs00533665_m1           | STAT2-Hs01013123_m1  |
| IFIT3-Hs00155468_m1           | TICAM1-Hs01090712_m1 |
| IFNA2-Hs02621172_s1           | TRIM21-Hs00172616_m1 |
| IFNB1-Hs01077958_s1           | ULBP2-Hs00607609_mH  |
| IFNG-Hs00174143_m1            | USP18-Hs00276441_m1  |
| IL15-Hs99999039_m1            | VISA-Hs00325038_m1   |
| IL18-Hs99999040_m1            | XAF1-Hs00213882_m1   |

## Primers and probes:

|        | Forward (5'-3')           | Probe (5'FAM--3'TAMARA)         | Reverse                        |
|--------|---------------------------|---------------------------------|--------------------------------|
| HCV:   | TCTGCGGAACCGGTGAGTA       | CACGGTCTACGAGACCTCCCGGGGCAC     | GTGTTTCTTTGGTTTTTCTTTGAGGTTTAG |
| HAV:   | GGTAGGCTACGGGTGAAAC       | CTTAGGCTAATACTTCTATGAAGAGATGC   | AACAACCTACCAATATCCGC           |
| ZIKV:  | CCGCTGCCAACACAAG          | AGCCTACCTTGACAAGCAGTCAGACACTCAA | CCACTAACGTTCTTTGCAGACAT        |
| CXCL9  | AGGAACCCAGTAGTGAGAAAGG    | CCTGCATCAGCACCAACCAAGGGA        | GGTCTTTCAAGGATGTAGGTGGAT       |
| CXCL10 | TGAAAAAGAAGGGTGAGAAGAGATG | CTGAATCCAGAATCGAAGGCCATCAAGA    | CCTTTCCTTGCTAACTGCTTTCAG       |
| IF16   | AAGGCCCTGACCTTCAT         | AGGAGGACTCGCAGTCGCC             | ATTCAGGATCGCAGACCA             |
| IRF9   | GCCCTACAAGGTGTATCAGTTGCT  | CCACCAGGAATCGTCTCTGGCCA         | TCGCTTTGATGGTACTTCTGAGT        |
| MX1    | AAGGAATGGGAATCAGTCATGAG   | CACCCTGGAGATCAGCTCCCGA          | TCTATTAGAGTCAGATCCGGGACAT      |
| OAS1   | TGTGTGTCCAAGGTGGTAAAGG    | CCTCAGGCAAGGGCACCACCT           | CAACCAGGTCAGCGTCAGATC          |
